# Supplementary material for: Endotrophin Levels Are Associated with Allograft Outcomes in Kidney Transplant Recipients
Source: MDPI journal article supplement (doi:10.3390/biom13050792), 2023-05-05
Supplement: s1 [file s1]

## Supplementary Materials

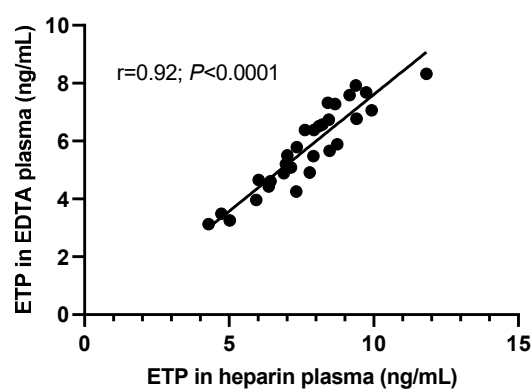

**Figure S1. Correlation between heparin and EDTA plasma ETP levels.** Spearman correlation between ETP measured in heparin and EDTA plasma. The correlation is based on matched samples from 30 healthy subjects.

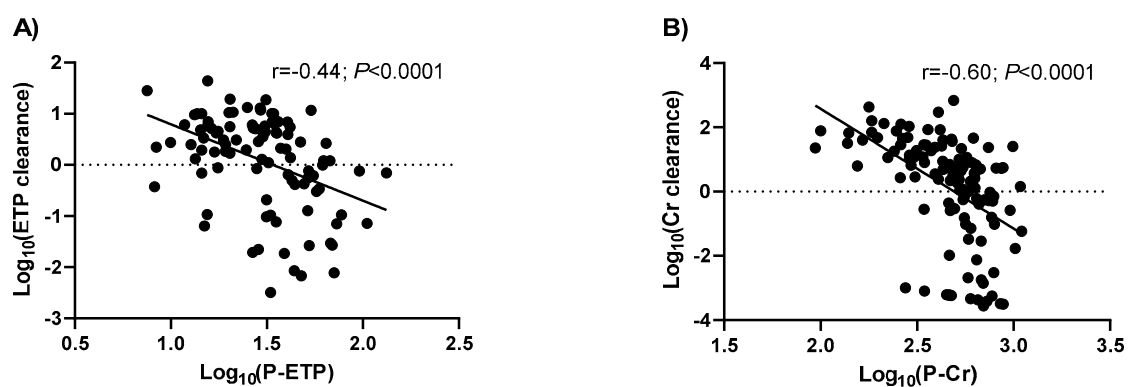

**Figure S2. Biomarker clearance in CONTEXT.** Clearance of (A) endotrophin and (B) creatinine at D1 in patients from CONTEXT.
